# Supplementary material for: Experiences and views of patients, carers and healthcare professionals on using modems in domiciliary non-invasive ventilation (NIV): a qualitative study
Source: PubMed Central journal article supplement — BMJ Open Respir Res. 2020 Mar 10;7(1):e000510. doi: 10.1136/bmjresp-2019-000510 (PMC7066605; doi:10.1136/bmjresp-2019-000510), 2020-03-10
Supplement: bmjresp-2019-000510supp001.pdf [file bmjresp-2019-000510supp001.pdf]

## Introduction

Renaissance Research has been asked by Royal Free Hospital and Philips Healthcare to undertake research exploring your experience of using the new modem-monitored ventilators.

As part of our investigation I want to ask you about experiences of looking after patients both before you had the modem-monitored ventilator and after it was installed.

You do not have to take part in this focus group and you can withdraw from it at any point. You do not have to answer any of my questions if you do not want to. It is up to you to decide. Also, please don't hesitate to ask for clarification on any of the questions if you are not sure what I mean.

It is very unlikely that anything in this focus group will upset you but if it does please let me know straight away and I will try to resolve the problem or find someone else to help you.

Are you happy to proceed?

We will be recording the discussion for our own reference only. Your answers will be confidential to the research team and you will not be personally identified in any way in our research report.

Can I turn on the tape recorder?

1. Please could you tell me how long you have been providing care for patients using a breathing machine at home and when you first started working with the breathing machine with the modem?
2. Can you explain how the modem works?
3. What would you say has been good about the modem on the breathing machine compared to not having one?
4. What has been not so good about having a modem on the breathing machines compared to not having one?
5. How does using a modem with on the ventilators impact on your practice?
6. Pick up on topics:
  - a. More control
  - b. Ease of monitoring
  - c. Change in care of patients
7. Would you say it is easier, harder or the same to care for patients with modems on their ventilators compared to not?
  - a. In what ways
  - b. Can this be attributed to the 'monitoring'

Present patient findings:

Now you know the outcome of the patient interviews does that change your opinion on:

- a) The benefits of modem technology
- b) The downside of modem technology
- c) How you would use modem technology in the future
