# Supplementary material for: Experiences and views of patients, carers and healthcare professionals on using modems in domiciliary non-invasive ventilation (NIV): a qualitative study
Source: PubMed Central journal article supplement — BMJ Open Respir Res. 2020 Mar 10;7(1):e000510. doi: 10.1136/bmjresp-2019-000510 (PMC7066605; doi:10.1136/bmjresp-2019-000510), 2020-03-10
Supplement: bmjresp-2019-000510supp002.pdf [file bmjresp-2019-000510supp002.pdf]

## Introduction

Renaissance Research has been asked by Royal Free Hospital and Philips Healthcare to undertake research exploring your experience of using the new modem-monitored ventilators.

As part of our investigation I want to ask you about experiences both before you had the modem-monitored ventilator and after it was installed.

You do not have to take part in this interview and you can withdraw from it at any point. You do not have to answer any of my questions if you do not want to. It is up to you to decide. Also, please don't hesitate to ask for clarification on any of the questions if you are not sure what I mean.

It is very unlikely that anything in this interview will upset you but if it does please let me know straight away and I will try to resolve the problem or find someone else to help you.

Are you happy to proceed?

We will be recording the discussion for our own reference only. Your answers will be confidential to the research team and you will not be personally identified in any way in our research report.

Can I turn on the tape recorder?

1. Please could you tell me how long you have been using a ventilator at home and when you received the ventilator with the modem?
2. Can you explain how it works?
3. What would you say has been good about the new ventilator compared to the old?
4. What has been not so good about the new ventilator compared to the old?
5. How does using the new machine make you feel?
6. Pick up on topics:
  - a. Feeling safer or more comfortable, confident
  - b. Feeling watched, controlled – loss of freedom.
7. Would you say your health has improved, remained the same or deteriorated since you started using the new ventilators?
  - a. In what ways
  - b. Can this be attributed to the 'monitoring'

Other topics?
