# Supplementary material for: Experiences and views of patients, carers and healthcare professionals on using modems in domiciliary non-invasive ventilation (NIV): a qualitative study
Source: PubMed Central journal article supplement — BMJ Open Respir Res. 2020 Mar 10;7(1):e000510. doi: 10.1136/bmjresp-2019-000510 (PMC7066605; doi:10.1136/bmjresp-2019-000510), 2020-03-10
Supplement: bmjresp-2019-000510supp003.pdf [file bmjresp-2019-000510supp003.pdf]

## Online supplement 3: Demographic characteristics of participants

|                                                                     | HCPs | Patients   | Carers                                         |
|---------------------------------------------------------------------|------|------------|------------------------------------------------|
| <b>Gender (M:F)</b>                                                 | 7:5  | 10:5       | 4:1                                            |
| <b>Age</b>                                                          |      |            | Not reported                                   |
| 25-34                                                               | 4    |            |                                                |
| 35-44                                                               | 6    | 1          |                                                |
| 45-54                                                               | 1    |            |                                                |
| 55-64                                                               | 1    | 3          |                                                |
| 65-74                                                               |      | 7          |                                                |
| 75-84                                                               |      | 4          |                                                |
| <b>Ethnicity</b>                                                    |      |            |                                                |
| White British                                                       | 9    | 12         | 2                                              |
| Asian British                                                       | 2    |            | 2                                              |
| White other                                                         | 1    |            |                                                |
| Afro-Caribbean                                                      |      | 2          | 1                                              |
| Middle Eastern                                                      |      | 1          |                                                |
| <b>Occupation</b>                                                   |      |            |                                                |
| Respiratory Consultant physician                                    | 5    |            |                                                |
| Physiotherapist                                                     | 3    |            |                                                |
| Specialist Trainee Registrar                                        | 3    |            |                                                |
| Senior Clinical Fellow                                              | 1    |            |                                                |
| <b>Diagnosis</b>                                                    |      |            | Diagnosis of patient to whom they provide care |
| Chronic Obstructive Pulmonary                                       |      | 6          |                                                |
| Chest wall deformity                                                |      | 2          | 1                                              |
| Neuromuscular disease                                               |      | 1          | 1                                              |
| Obesity related respiratory failure                                 |      | 3          | 2                                              |
| Other*                                                              |      | 3          | 1                                              |
| <b>Years involved in the care of sleep and ventilation patients</b> |      |            |                                                |
| 1-5 years                                                           | 6    |            |                                                |
| 6-10 years                                                          | 3    |            |                                                |
| 11-15 years                                                         | 2    |            |                                                |
| 16-20 years                                                         | 1    |            |                                                |
| <b>Mean(SD) duration (Years) receiving home NIV</b>                 |      | 4.31(2.19) |                                                |

\*COPD/OSA=1 Cystic lesions n=1, Allergic Bronchopulmonary Aspergillosis

n=1
